# Supplementary material for: Proteomic Response of Three Marine Ammonia-Oxidizing Archaea to Hydrogen Peroxide and Their Metabolic Interactions with a Heterotrophic Alphaproteobacterium
Source: PubMed Central journal article supplement (PMC6593220; doi:10.1128/msystems.00181-19), 2019-06-25

**A****Culture conditions:** with Catalase with *O. alexandrii* H<sub>2</sub>O<sub>2</sub> inhibited H<sub>2</sub>O<sub>2</sub> non-inhibited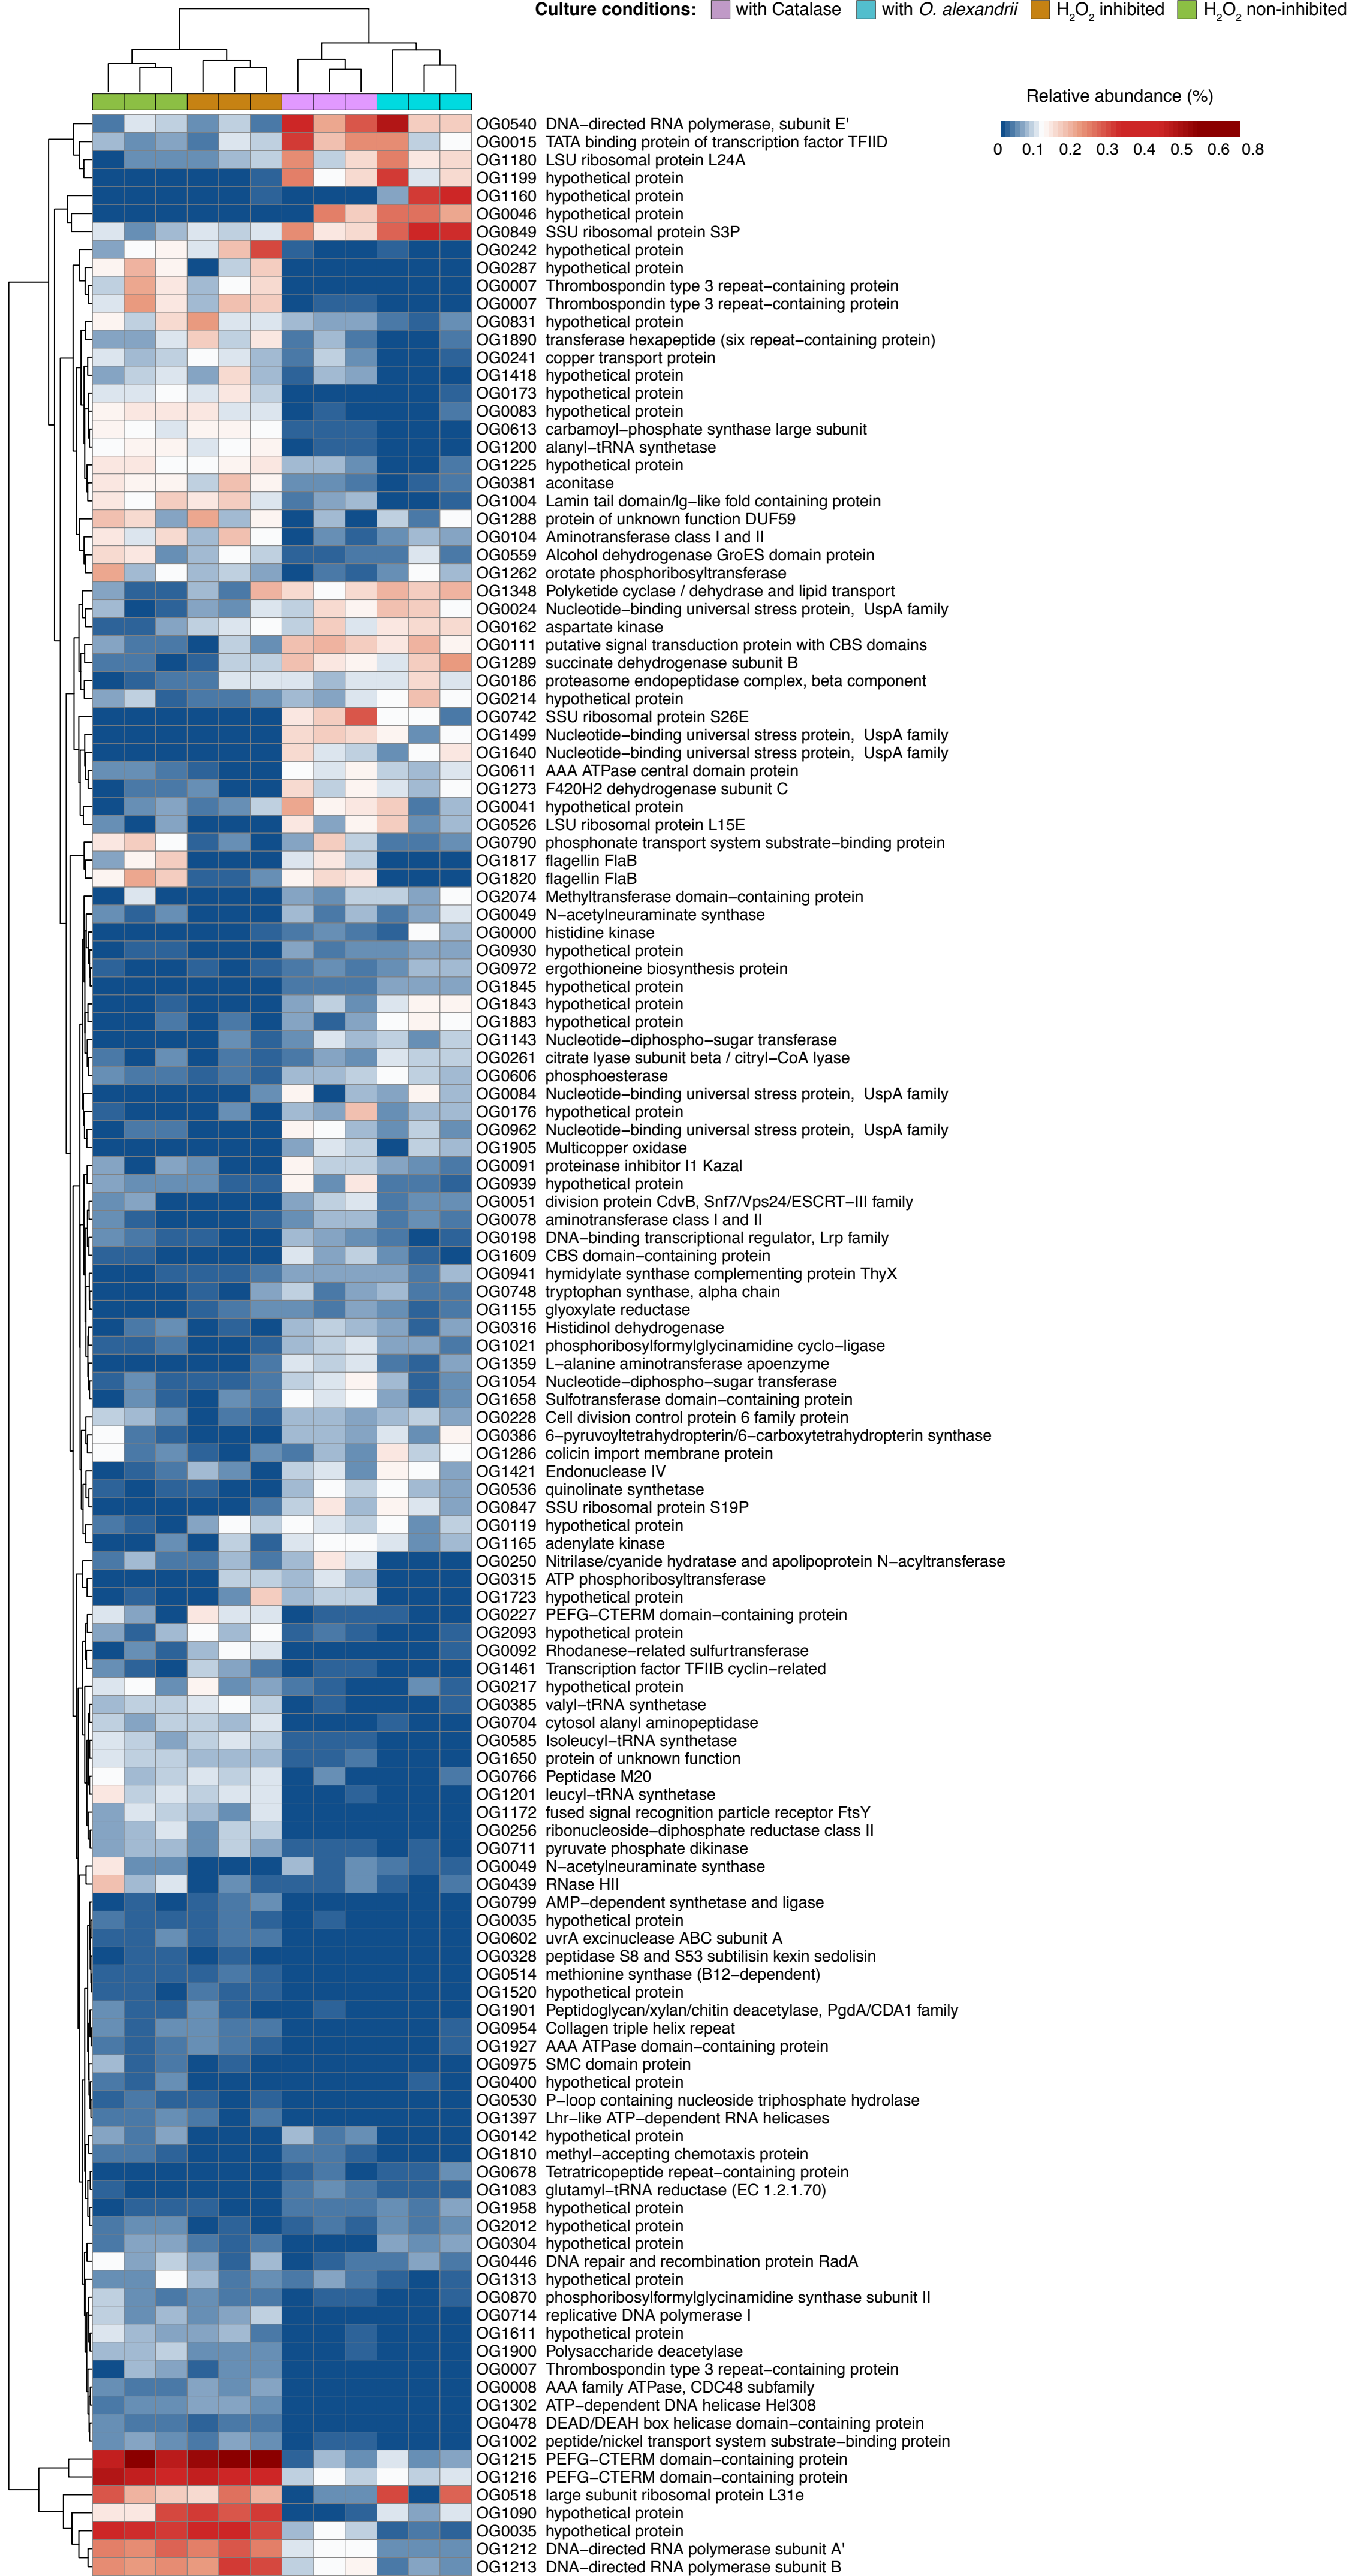

**B**Culture conditions: ■ with Catalase ■ with *O. alexandrii* ■ H<sub>2</sub>O<sub>2</sub> inhibited ■ H<sub>2</sub>O<sub>2</sub> non-inhibited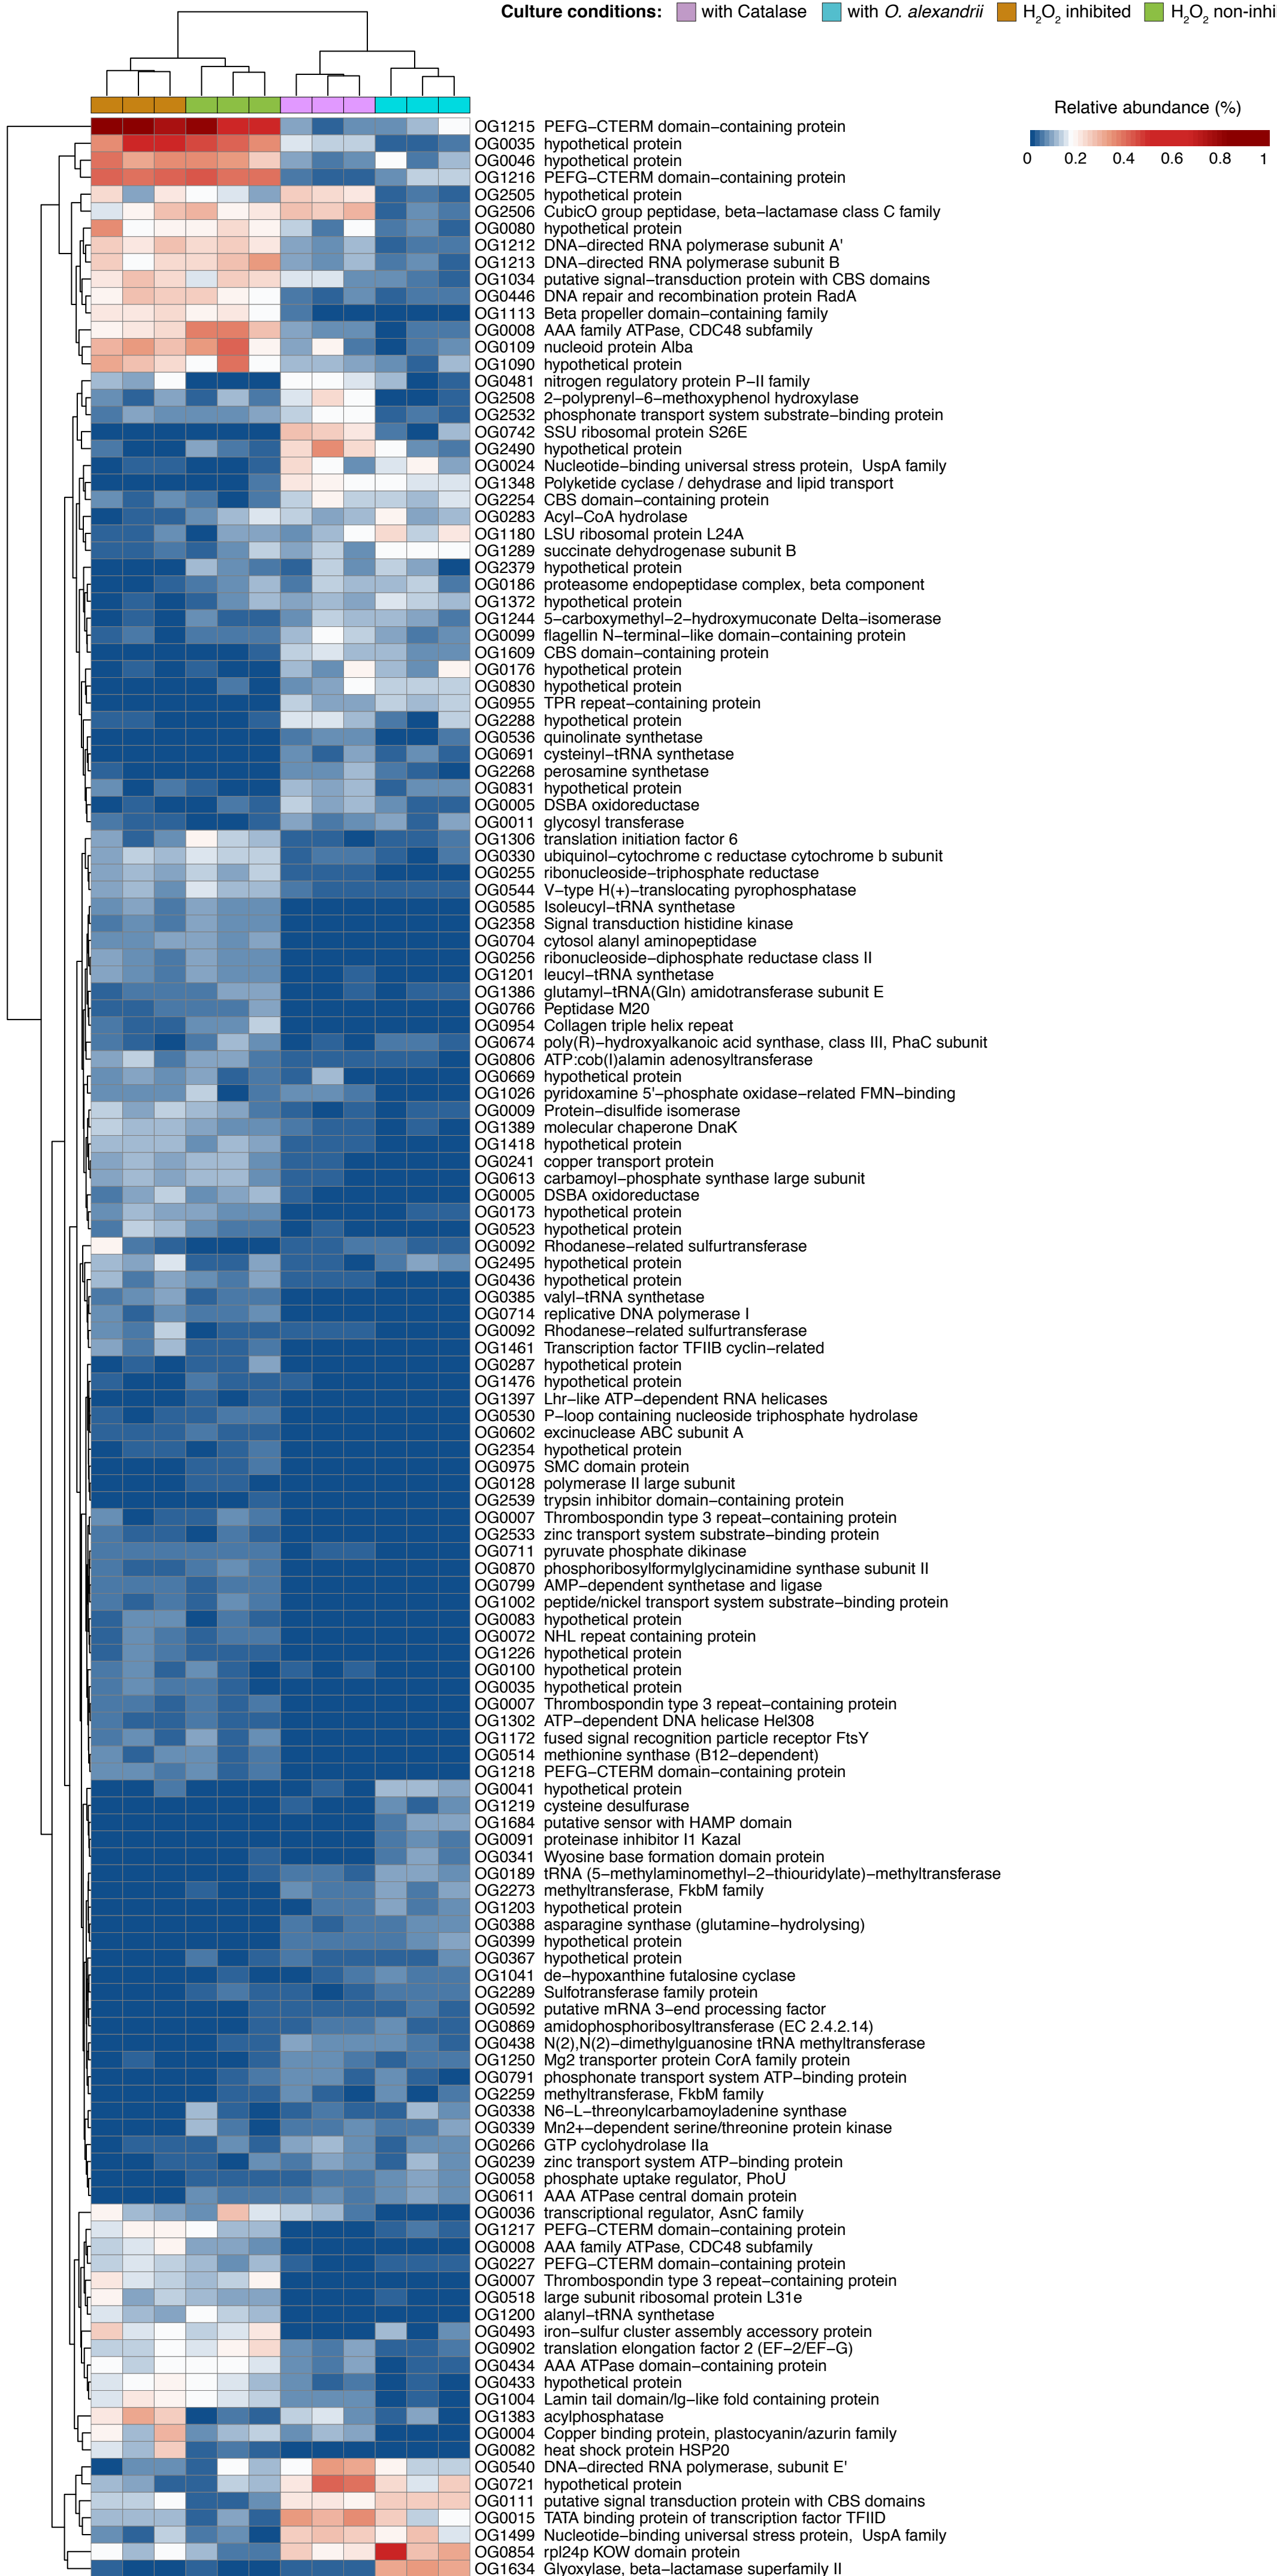

**C****Culture conditions:** ■ with Catalase ■ with *O. alexandrii* ■ H<sub>2</sub>O<sub>2</sub> inhibited ■ H<sub>2</sub>O<sub>2</sub> non-inhibited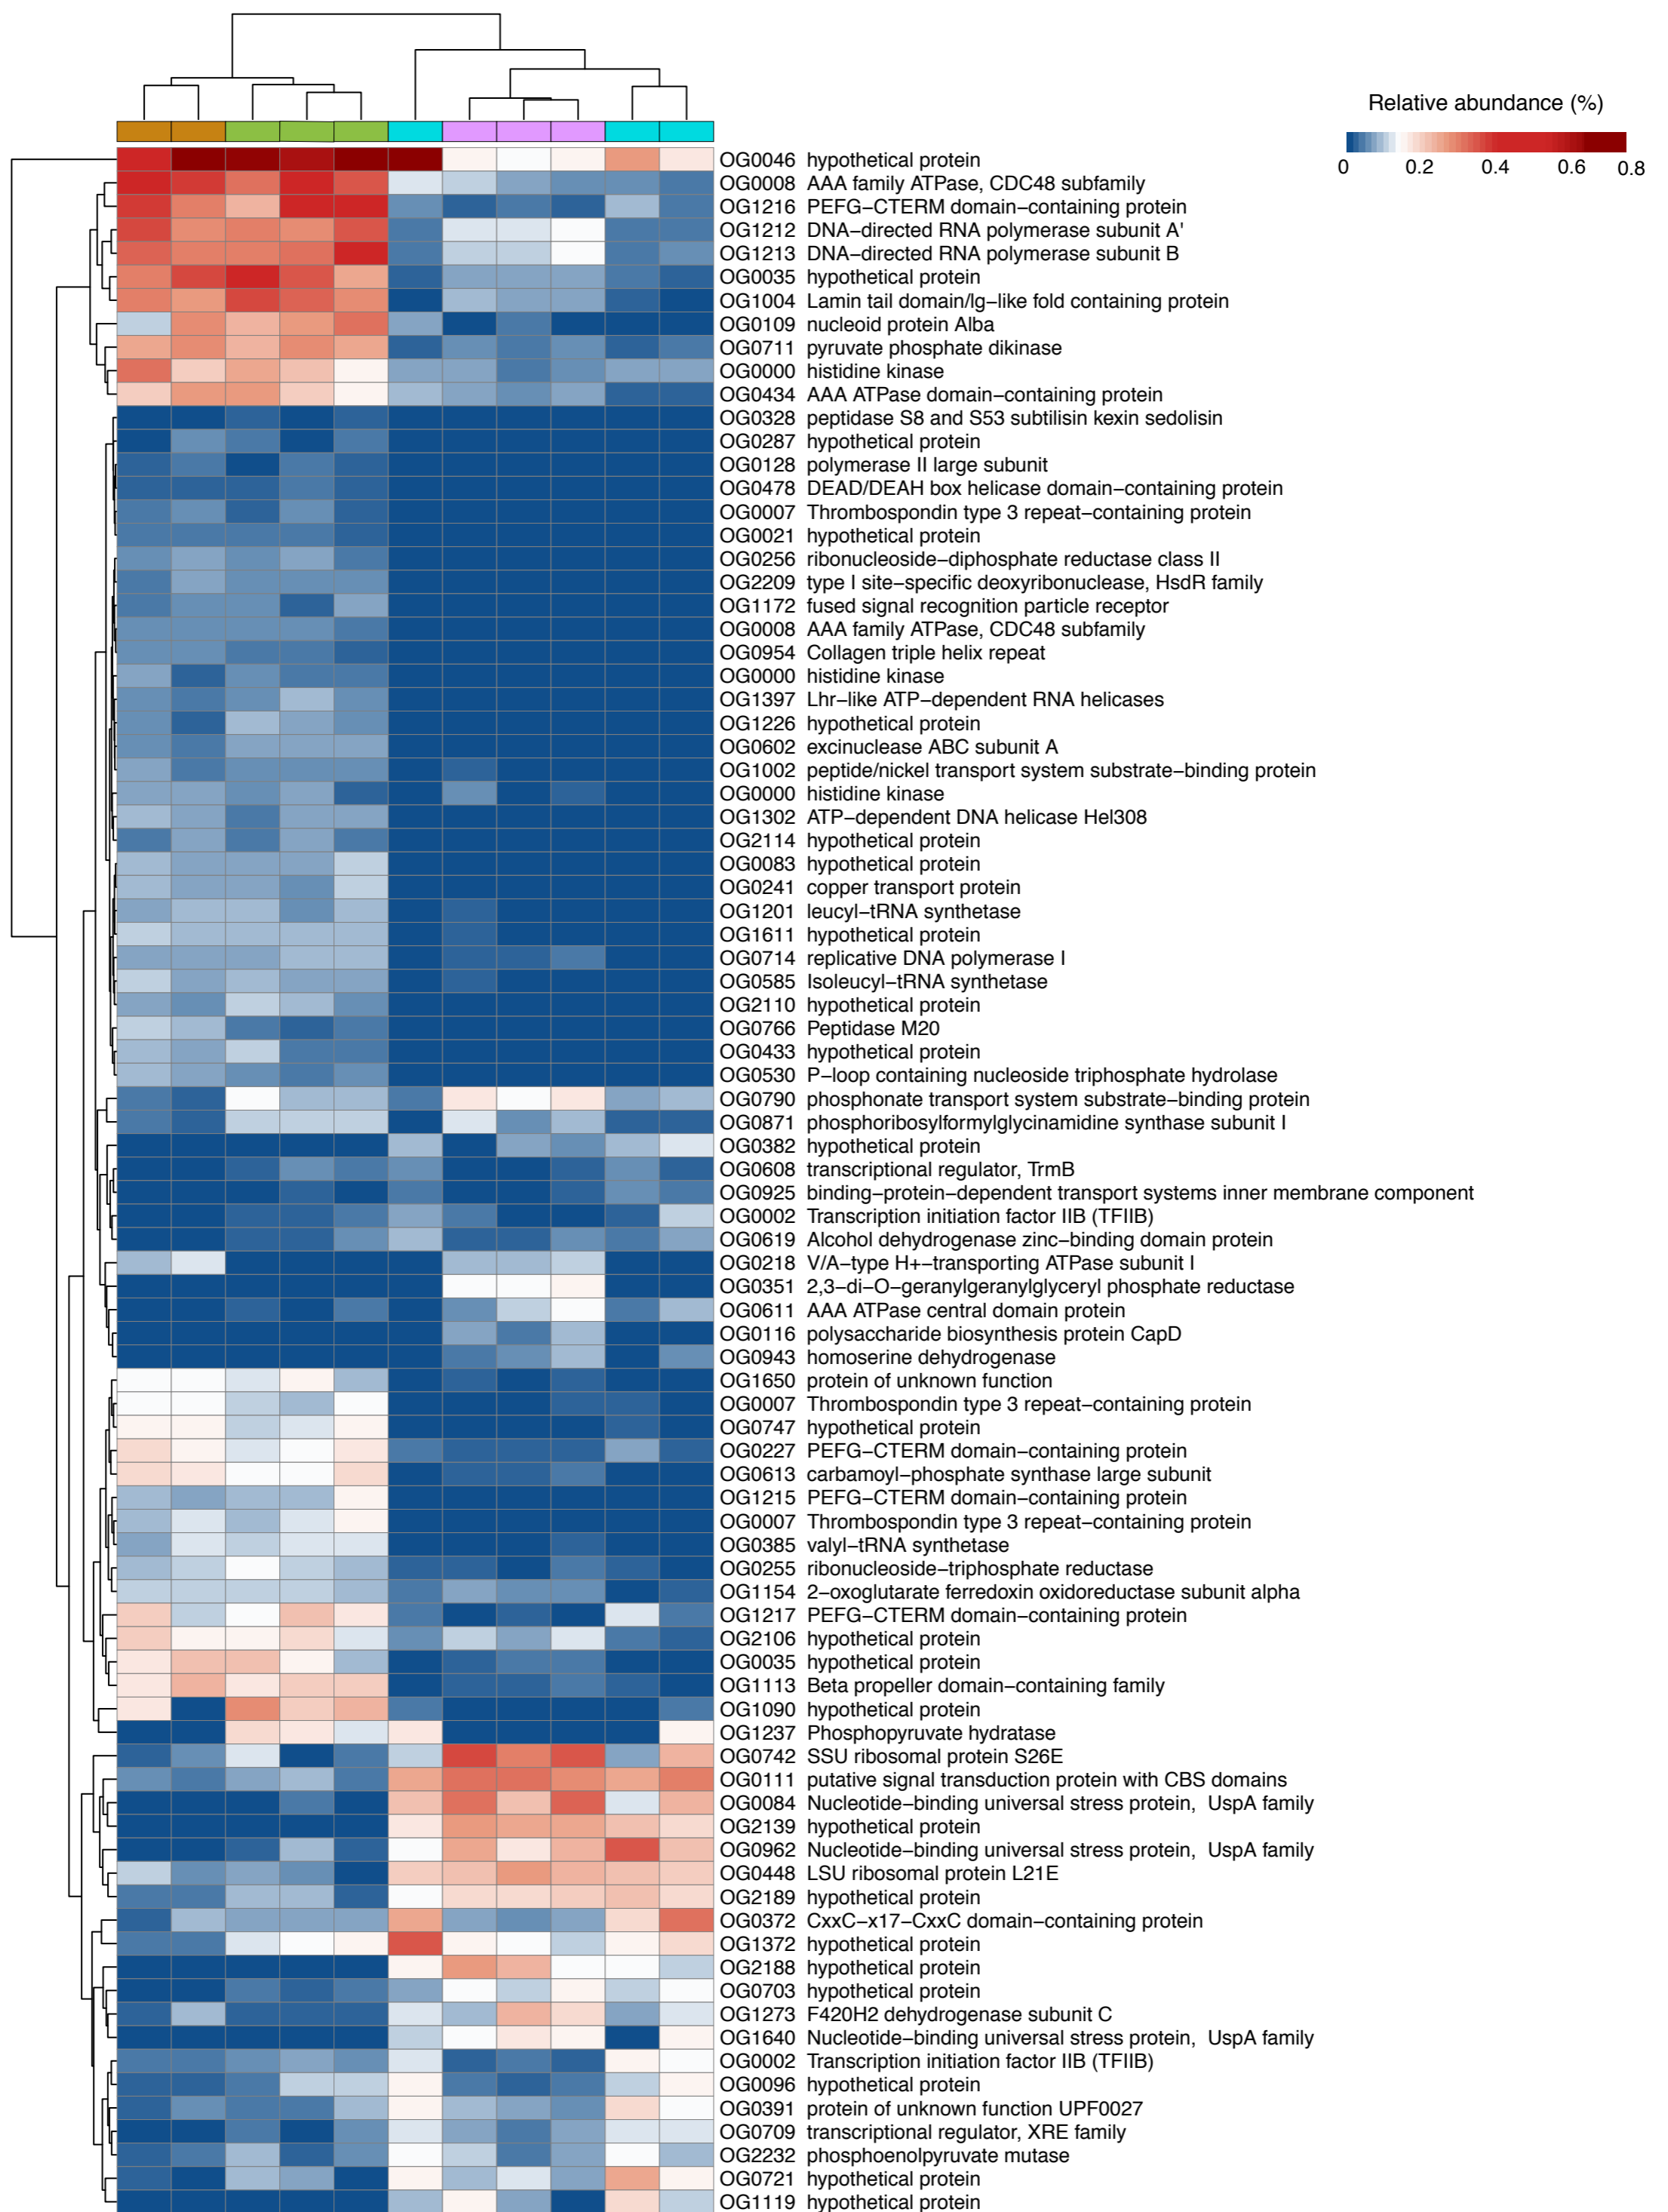

Supplement: mSystems.00181-19-sf002.pdf [file mSystems.00181-19-sf002.pdf]
