# Supplementary material for: Proteomic Response of Three Marine Ammonia-Oxidizing Archaea to Hydrogen Peroxide and Their Metabolic Interactions with a Heterotrophic Alphaproteobacterium
Source: PubMed Central journal article supplement (PMC6593220; doi:10.1128/msystems.00181-19), 2019-06-25

16S rRNA gene copies  
(relative to maximum)

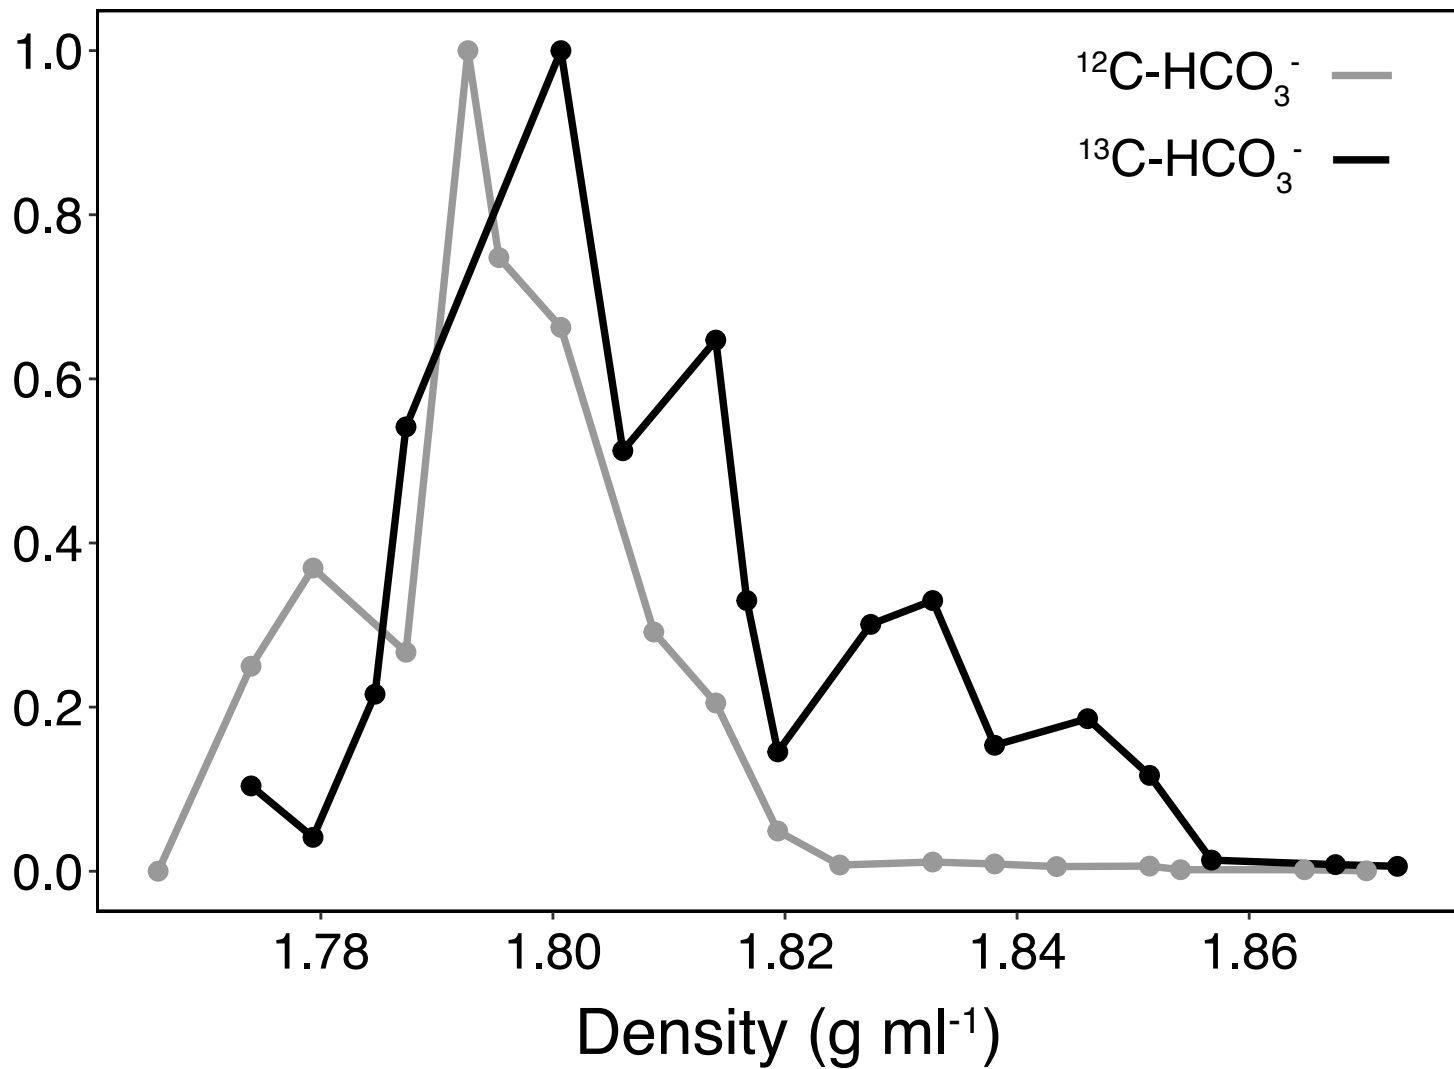

Supplement: mSystems.00181-19-sf005.pdf [file mSystems.00181-19-sf005.pdf]
